# Supplementary material
Source: PubMed Central journal article supplement (PMC6538535)
Supplement: EMS83014-supplement-Supplementary_Information.pdf [file EMS83014-supplement-Supplementary_Information.pdf]

**Supplementary Table 1.** Therapies for non-MEN1 pancreatic neuroendocrine tumours (NETs)  
(published after 2011)

|                                           | <b>Tumour type<sup>a</sup></b>                                                   | <b>Intervention</b>                                                           | <b>Number of participants/Information available on MEN1 patients/Number of MEN1 patients</b> |
|-------------------------------------------|----------------------------------------------------------------------------------|-------------------------------------------------------------------------------|----------------------------------------------------------------------------------------------|
| <b>Somatostatin analogues</b>             |                                                                                  |                                                                               |                                                                                              |
| Caplin <i>et al.</i> <sup>1</sup>         | GEPNET                                                                           | Lanreotide LAR 120 mg or placebo                                              | 204/Yes/Excluded from participation                                                          |
| Caplin <i>et al.</i> <sup>2</sup>         | GEPNET                                                                           | Lanreotide LAR 120 mg (continuing or switched from placebo).                  | 88/Yes/Excluded from participation                                                           |
| Martin-Richard <i>et al.</i> <sup>3</sup> | GEP-NET, bronchopulmonary NET and neuroendocrine carcinoma                       | Lanreotide LAR 120 mg                                                         | 30/No/Na                                                                                     |
| Yao <i>et al.</i> <sup>4</sup>            | NETs including PNETs                                                             | Pasireotide LAR 80 or 120 mg                                                  | 29/No/NA                                                                                     |
| Cives <i>et al.</i> <sup>5</sup>          | NETs including PNETs                                                             | Pasireotide LAR 60 mg                                                         | 29/No/NA                                                                                     |
| Wolin <i>et al.</i> <sup>6</sup>          | NETs of digestive system including PNETs (two cases only) and carcinoid symptoms | Pasireotide LAR 60 mg or octreotide LAR 40 mg                                 | 110/No/NA                                                                                    |
| Ramundo <i>et al.</i> <sup>7</sup>        | Duodeno-PNETs                                                                    | Octreotide LAR 30mg                                                           | 20/Yes/20                                                                                    |
| Cioppi <i>et al.</i> <sup>8</sup>         | GEP-NETs                                                                         | Octreotide LAR 30mg                                                           | 8/Yes/8                                                                                      |
| <b>Tyrosine kinase inhibitors</b>         |                                                                                  |                                                                               |                                                                                              |
| Raymond <i>et al.</i> <sup>9</sup>        | PNET                                                                             | Sunitinib 37.5 mg or placebo                                                  | 171/Yes/2                                                                                    |
| Ahn <i>et al.</i> <sup>10</sup>           | GEPNET                                                                           | Pazopanib 800 mg                                                              | 37/No/NA                                                                                     |
| Phan <i>et al.</i> <sup>11</sup>          | PNET or carcinoid                                                                | Pazopanib 800 mg + octreotide                                                 | 52/No/NA                                                                                     |
| Strosberg <i>et al.</i> <sup>12</sup>     | PNET or carcinoid                                                                | Sunitinib 37.5 mg, following hepatic transarterial embolization               | 39/No/NA                                                                                     |
| <b>mTOR inhibitors</b>                    |                                                                                  |                                                                               |                                                                                              |
| Pavel <i>et al.</i> <sup>13</sup>         | NETs including PNETs with carcinoid syndrome                                     | Everolimus 10 mg + octreotide 30 mg or Placebo + octreotide 30 mg             | 429/No/NA                                                                                    |
| Anthony <i>et al.</i> <sup>14</sup>       | NETs including PNETs with carcinoid syndrome                                     | Assessment of effect of previous treatment with SSAs on outcome of everolimus | Previous SSAs 339/No/NA<br>No previous SSAs 90/No/NA                                         |
| Yao <i>et al.</i> <sup>15</sup>           | PNET                                                                             | Everolimus 10 mg or placebo                                                   | 410/No/NA                                                                                    |
| Lombard-Bohas <i>et al.</i> <sup>16</sup> | PNET (Subgroup analysis of Yao <i>et al.</i> <sup>15</sup> )                     | Everolimus 10 mg or placebo                                                   | 410/No/NA                                                                                    |
| Yao <i>et al.</i> <sup>17</sup>           | PNET (Overall survival data from Yao <i>et al.</i> <sup>15</sup> )               | Everolimus 10 mg                                                              | 410/No/NA                                                                                    |
| Oh <i>et al.</i> <sup>18</sup>            | NET, including PNTS, pheochromocytoma or extraadrenal paragangliomas             | Everolimus 10 mg                                                              | 34/No/NA                                                                                     |
| Chan <i>et al.</i> <sup>19</sup>          | PNET                                                                             | Temozolomide + everolimus 5 mg or temozolomide + everolimus 10 mg             | 43/No/NA                                                                                     |
| Chan <i>et al.</i> <sup>20</sup>          | PNET or carcinoid                                                                | Everolimus + pasireotide                                                      | 22/No/NA                                                                                     |
| Chan <i>et al.</i> <sup>21</sup>          | PNET or carcinoid                                                                | Everolimus 10 mg + sorafenib 400 mg or                                        | 21/No/NA                                                                                     |

| Everolimus 10 mg + sorafenib 600 mg          |                    |                                                                                                        |                              |
|----------------------------------------------|--------------------|--------------------------------------------------------------------------------------------------------|------------------------------|
| <b>Anti-IGF-1 receptor</b>                   |                    |                                                                                                        |                              |
| Dasari <i>et al.</i> <sup>22</sup>           | PNET or carcinoid  | Cixutumumab + everolimus 10 mg + octreotide LAR 20 mg                                                  | 19/Yes/0                     |
| Reidy-Lagunes <i>et al.</i> <sup>23</sup>    | PNET or carcinoid  | Dalotuzumab                                                                                            | 25/No/NA                     |
| Strosberg <i>et al.</i> <sup>24</sup>        | PNET or carcinoid  | Ganitumab                                                                                              | 60/No/NA                     |
| <b>EGFR antibodies and PI3K (mTOR)</b>       |                    |                                                                                                        |                              |
| Bendell <i>et al.</i> <sup>25</sup>          | PNET or carcinoid  | Bevacizumab + pertuzumab + octreotide LAR 30 mg                                                        | 43/No/NA                     |
| Fazio <i>et al.</i> <sup>26</sup>            | PNET               | Dactosilib                                                                                             | 31/No/NA                     |
| <b>Peptide receptor radionuclide therapy</b> |                    |                                                                                                        |                              |
| Claringbold <i>et al.</i> <sup>27</sup>      | NET including PNET | <sup>77</sup> Lu-octreotate + capecitabine + temozolamide (first escalating doses, then stabile dosis) | 35/No/NA                     |
| <b>VEGF and VEGFR antibodies</b>             |                    |                                                                                                        |                              |
| Chan <i>et al.</i> <sup>28</sup>             | PNET or carcinoid  | Cabozantinib                                                                                           | 61/No/NA (In abstract form)  |
| Ducreux <i>et al.</i> <sup>29</sup>          | PNET               | Bevacizumab + capecitabine                                                                             | 34/No/NA                     |
| Berruti <i>et al.</i> <sup>30</sup>          | NET including PNET | Bevacizumab + cepacitabine + octreotide                                                                | 45/No/NA                     |
| Chan <i>et al.</i> <sup>31</sup>             | PNET or carcinoid  | Bevacizumab + temozolomide                                                                             | 34/No/NA                     |
| Hobday <i>et al.</i> <sup>32</sup>           | PNET               | Temsirolimus + bevacizumab                                                                             | 58/No/NA                     |
| Kulke <i>et al.</i> <sup>33</sup>            | PNET               | Everolimus 10 mg + octreotide or everolimus 10 mg + bevacizumab + octreotide                           | 150/No/NA (In abstract form) |

GEPNET – Gastroenteropancreatic neuroendocrine tumour; PNET – pancreatic neuroendocrine tumour; NET – neuroendocrine tumour  
 LAR – long acting release formulation  
 NA – not available

## References

- 1 Caplin, M. E. *et al.* Lanreotide in metastatic enteropancreatic neuroendocrine tumors. *N Engl J Med* **371**, 224-233, doi:10.1056/NEJMoa1316158 (2014).
- 2 Caplin, M. E. *et al.* Anti-tumour effects of lanreotide for pancreatic and intestinal neuroendocrine tumours: the CLARINET open-label extension study. *Endocr Relat Cancer* **23**, 191-199, doi:10.1530/ERC-15-0490 (2016).
- 3 Martin-Richard, M. *et al.* Antiproliferative effects of lanreotide autogel in patients with progressive, well-differentiated neuroendocrine tumours: a Spanish, multicentre, open-label, single arm phase II study. *BMC Cancer* **13**, 427, doi:10.1186/1471-2407-13-427 (2013).

- 4 Yao, J. C. *et al.* Phase I dose-escalation study of long-acting pasireotide in patients with neuroendocrine tumors. *OncoTargets and therapy* **10**, 3177-3186, doi:10.2147/ott.s128547 (2017).
- 5 Cives, M. *et al.* Phase II clinical trial of pasireotide long-acting repeatable in patients with metastatic neuroendocrine tumors. *Endocr Relat Cancer* **22**, 1-9, doi:10.1530/ERC-14-0360 (2015).
- 6 Wolin, E. M. *et al.* Phase III study of pasireotide long-acting release in patients with metastatic neuroendocrine tumors and carcinoid symptoms refractory to available somatostatin analogues. *Drug Des Devel Ther* **9**, 5075-5086, doi:10.2147/DDDT.S84177 (2015).
- 7 Ramundo, V. *et al.* Impact of long-acting octreotide in patients with early-stage MEN1-related duodeno-pancreatic neuroendocrine tumours. *Clin Endocrinol (Oxf)* **80**, 850-855, doi:10.1111/cen.12411 (2014).
- 8 Cioppi, F., Cianferotti, L., Masi, L., Giusti, F. & Brandi, M. L. The LARO-MEN1 study: a longitudinal clinical experience with octreotide Long-Acting Release in patients with Multiple Endocrine Neoplasia type 1 Syndrome. *Clinical Cases in Mineral and Bone Metabolism* **14**, 123-130 (2017).
- 9 Raymond, E. *et al.* Sunitinib malate for the treatment of pancreatic neuroendocrine tumors. *N Engl J Med* **364**, 501-513, doi:10.1056/NEJMoa1003825 (2011).
- 10 Ahn, H. K. *et al.* Phase II study of pazopanib monotherapy in metastatic gastroenteropancreatic neuroendocrine tumours. *Br J Cancer* **109**, 1414-1419, doi:10.1038/bjc.2013.470 (2013).
- 11 Phan, A. T. *et al.* Pazopanib and depot octreotide in advanced, well-differentiated neuroendocrine tumours: a multicentre, single-group, phase 2 study. *Lancet Oncol* **16**, 695-703, doi:10.1016/S1470-2045(15)70136-1 (2015).
- 12 Strosberg, J. R. *et al.* A phase II clinical trial of sunitinib following hepatic transarterial embolization for metastatic neuroendocrine tumors. *Ann Oncol* **23**, 2335-2341, doi:10.1093/annonc/mdr614 (2012).
- 13 Pavel, M. E. *et al.* Everolimus plus octreotide long-acting repeatable for the treatment of advanced neuroendocrine tumours associated with carcinoid syndrome (RADIANT-2): a randomised, placebo-controlled, phase 3 study. *Lancet* **378**, 2005-2012, doi:10.1016/S0140-6736(11)61742-X (2011).
- 14 Anthony, L. B. *et al.* Impact of Previous Somatostatin Analogue Use on the Activity of Everolimus in Patients with Advanced Neuroendocrine Tumors: Analysis from the Phase III RADIANT-2 Trial. *Neuroendocrinology* **102**, 18-25, doi:10.1159/000381715 (2015).
- 15 Yao, J. C. *et al.* Everolimus for advanced pancreatic neuroendocrine tumors. *N Engl J Med* **364**, 514-523, doi:10.1056/NEJMoa1009290 (2011).
- 16 Lombard-Bohas, C. *et al.* Impact of prior chemotherapy use on the efficacy of everolimus in patients with advanced pancreatic neuroendocrine tumors: a subgroup analysis of the phase III RADIANT-3 trial. *Pancreas* **44**, 181-189, doi:10.1097/MPA.0000000000000262 (2015).

- 17 Yao, J. C. *et al.* Everolimus for the Treatment of Advanced Pancreatic Neuroendocrine Tumors: Overall Survival and Circulating Biomarkers From the Randomized, Phase III RADIANT-3 Study. *J Clin Oncol*, doi:10.1200/JCO.2016.68.0702 (2016).
- 18 Oh, D. Y. *et al.* Phase 2 study of everolimus monotherapy in patients with nonfunctioning neuroendocrine tumors or pheochromocytomas/paragangliomas. *Cancer* **118**, 6162-6170, doi:10.1002/cncr.27675 (2012).
- 19 Chan, J. A. *et al.* A prospective, phase 1/2 study of everolimus and temozolomide in patients with advanced pancreatic neuroendocrine tumor. *Cancer* **119**, 3212-3218, doi:10.1002/cncr.28142 (2013).
- 20 Chan, J. A. *et al.* Phase I study of pasireotide (SOM 230) and everolimus (RAD001) in advanced neuroendocrine tumors. *Endocr Relat Cancer* **19**, 615-623, doi:10.1530/ERC-11-0382 (2012).
- 21 Chan, J. A. *et al.* Phase I study of sorafenib in combination with everolimus (RAD001) in patients with advanced neuroendocrine tumors. *Cancer Chemother Pharmacol* **71**, 1241-1246, doi:10.1007/s00280-013-2118-9 (2013).
- 22 Dasari, A. *et al.* Phase I study of the anti-IGF1R antibody cixutumumab with everolimus and octreotide in advanced well-differentiated neuroendocrine tumors. *Endocr Relat Cancer* **22**, 431-441, doi:10.1530/ERC-15-0002 (2015).
- 23 Reidy-Lagunes, D. L. *et al.* A phase 2 study of the insulin-like growth factor-1 receptor inhibitor MK-0646 in patients with metastatic, well-differentiated neuroendocrine tumors. *Cancer* **118**, 4795-4800, doi:10.1002/cncr.27459 (2012).
- 24 Strosberg, J. R. *et al.* A multi-institutional, phase II open-label study of ganitumab (AMG 479) in advanced carcinoid and pancreatic neuroendocrine tumors. *Endocr Relat Cancer* **20**, 383-390, doi:10.1530/ERC-12-0390 (2013).
- 25 Bendell, J. C. *et al.* A Phase II Study of the Combination of Bevacizumab, Pertuzumab, and Octreotide LAR for Patients with Advanced Neuroendocrine Cancers. *Cancer Invest* **34**, 213-219, doi:10.3109/07357907.2016.1174257 (2016).
- 26 Fazio, N. *et al.* A Phase II Study of BEZ235 in Patients with Everolimus-resistant, Advanced Pancreatic Neuroendocrine Tumours. *Anticancer Res* **36**, 713-719 (2016).
- 27 Claringbold, P. G., Price, R. A. & Turner, J. H. Phase I-II study of radiopeptide <sup>177</sup>Lu-octreotate in combination with capecitabine and temozolomide in advanced low-grade neuroendocrine tumors. *Cancer Biother Radiopharm* **27**, 561-569, doi:10.1089/cbr.2012.1276 (2012).
- 28 Chan, J. A. *et al.* Phase II trial of cabozantinib in patients with carcinoid and pancreatic neuroendocrine tumors (pNET). *J Clin Oncol* **35**, suppl 4S; abstract 228 (2017).
- 29 Ducreux, M. *et al.* Bevacizumab combined with 5-FU/streptozocin in patients with progressive metastatic well-differentiated pancreatic endocrine tumours (BETTER trial)--a phase II non-randomised trial. *Eur J Cancer* **50**, 3098-3106, doi:10.1016/j.ejca.2014.10.002 (2014).

- 30 Berruti, A. *et al.* Bevacizumab plus octreotide and metronomic capecitabine in patients with metastatic well-to-moderately differentiated neuroendocrine tumors: the XELBEVOCT study. *BMC Cancer* **14**, 184, doi:10.1186/1471-2407-14-184 (2014).
- 31 Chan, J. A. *et al.* Prospective study of bevacizumab plus temozolomide in patients with advanced neuroendocrine tumors. *J Clin Oncol* **30**, 2963-2968, doi:10.1200/JCO.2011.40.3147 (2012).
- 32 Hobday, T. J. *et al.* Multicenter Phase II Trial of Temsirolimus and Bevacizumab in Pancreatic Neuroendocrine Tumors. *J Clin Oncol* **33**, 1551-1556, doi:10.1200/JCO.2014.56.2082 (2015).
- 33 Kulke, M. Randomized phase II study of everolimus (E) versus everolimus plus bevacizumab (E+B) in patients (Pts) with locally advanced or metastatic pancreatic neuroendocrine tumors (pNET), CALGB 80701 (Alliance). *J Clin Oncol* **33**, Suppl; abstr 4005 (2015).

**Supplementary Table 2.** Classification of chemotherapy drugs.

|                                             |                                                                                                                                                                                                                                                                                                                                                                                                                 |
|---------------------------------------------|-----------------------------------------------------------------------------------------------------------------------------------------------------------------------------------------------------------------------------------------------------------------------------------------------------------------------------------------------------------------------------------------------------------------|
| <b>Alkylating agents<sup>a</sup></b>        | <ul style="list-style-type: none"><li>• Nitrogen mustards, e.g. <i>cyclophosphamide<sup>c</sup></i>, chlorambucil</li><li>• Nitrosoureas, e.g. <i>streptozocin</i></li><li>• Tetrazines, e.g. <i>dacarbazine</i>, <i>temozolomide</i></li><li>• Aziridines, e.g. thiotepa, mytomycin</li><li>• Cisplatin, e.g. <i>cisplatin</i>, <i>oxabiplatin</i></li><li>• Non-classical, e.g. <i>procarbazine</i></li></ul> |
| <b>Anti-microtubule agents<sup>a</sup></b>  | <ul style="list-style-type: none"><li>• Vincalkaloids, e.g. vinaristine, vinblastine</li><li>• Taxanes, e.g. paclitaxel, <i>docetaxel</i></li><li>• Podophyllotoxins, e.g. <i>etoposide</i></li><li>•</li></ul>                                                                                                                                                                                                 |
| <b>Topoisomerase inhibitors<sup>a</sup></b> | <ul style="list-style-type: none"><li>• <i>Doxorubicin</i></li><li>• <i>Etoposide</i></li><li>• <i>Irinotecan</i></li></ul>                                                                                                                                                                                                                                                                                     |
| <b>Cytotoxic antibodies<sup>b</sup></b>     | <ul style="list-style-type: none"><li>• Anthracyclines, e.g. <i>doxorubicin</i></li><li>• Bleomycins</li><li>• <i>Mitomycin C</i></li><li>• <i>Acinomycin D</i></li><li>• <i>Mitoxantrone</i></li></ul>                                                                                                                                                                                                         |
| <b>Antimetabolites<sup>b</sup></b>          | <ul style="list-style-type: none"><li>• Antifolates, e.g. methotrexate</li><li>• Fluoropyrimidines, e.g. <i>fluorouracil</i>, <i>capecitabine</i></li><li>• Deoxynucleoside analogues, e.g. <i>gemcitabine</i></li><li>• Thiopurines, e.g. mercaptopurine</li></ul>                                                                                                                                             |
| <b>Non classical compounds</b>              |                                                                                                                                                                                                                                                                                                                                                                                                                 |

<sup>a</sup>Nuclear targets; <sup>b</sup>cytoplasmic targets; <sup>c</sup>drugs shown in italics have been used to treat gastroenteropancreatic neuroendocrine tumours (GEPNETs).
